# Supplementary material for: The AUXIN RESPONSE FACTOR 2 gene of Arabidopsis links auxin signalling, cell division, and the size of seeds and other organs
Source: Oxford University Press journal article supplement (doi:10.1242/dev.02194), 2005-12-08
Supplement: dev02194supptable.pdf [file dev02194supptable.pdf]

**Table S1. Dimensions of developing seeds in wild-type and *mnt* plants**

| Stage                                                             | Length ( $\mu\text{m}$ ) |              | Width ( $\mu\text{m}$ ) |              | Area seed cavity ( $\mu\text{m}^2$ ) |                    |
|-------------------------------------------------------------------|--------------------------|--------------|-------------------------|--------------|--------------------------------------|--------------------|
|                                                                   | Wild type                | <i>mnt</i>   | Wild type               | <i>mnt</i>   | Wild type                            | <i>mnt</i>         |
| Preglobular ( <i>n</i> =16 for wild type, 18 for <i>mnt</i> )     | 325 $\pm$ 8              | 472 $\pm$ 20 | 213 $\pm$ 5             | 279 $\pm$ 14 | 22 187 $\pm$ 1046                    | 43 778 $\pm$ 4547  |
| Globular ( <i>n</i> =25 for wild type, 14 for <i>mnt</i> )        | 391 $\pm$ 6              | 533 $\pm$ 12 | 250 $\pm$ 4             | 319 $\pm$ 6  | 30 160 $\pm$ 1570                    | 59 857 $\pm$ 2436  |
| Heart ( <i>n</i> =15 for wild type, 16 for <i>mnt</i> )           | 479 $\pm$ 7              | 659 $\pm$ 13 | 327 $\pm$ 6             | 408 $\pm$ 8  | 57 800 $\pm$ 2671                    | 106 688 $\pm$ 5152 |
| Torpedo ( <i>n</i> =20 for wild type, 16 for <i>mnt</i> )         | 534 $\pm$ 5              | 708 $\pm$ 9  | 367 $\pm$ 5             | 441 $\pm$ 11 | 86 000 $\pm$ 2198                    | 154 125 $\pm$ 3453 |
| Bent cotyledon ( <i>n</i> =11 for wild type, 18 for <i>mnt</i> )  | 542 $\pm$ 10             | 739 $\pm$ 11 | 376 $\pm$ 6             | 482 $\pm$ 7  | 96 091 $\pm$ 3206                    | 170 000 $\pm$ 5333 |
| Curled cotyledon ( <i>n</i> =7 for wild type, 28 for <i>mnt</i> ) | 513 $\pm$ 8              | 745 $\pm$ 9  | 369 $\pm$ 4             | 445 $\pm$ 10 | 93 286 $\pm$ 4487                    | 170 536 $\pm$ 4549 |

Data represent mean $\pm$ s.e.m.
